# Supplementary material for: Kinetics of the reactions of the Criegee intermediate CH2OO with water vapour: experimental measurements as a function of temperature and global atmospheric modelling
Source: Royal Society of Chemistry journal article supplement (doi:10.1039/d4ea00097h), 2024-01-01
Supplement: d4ea00097h1.pdf [file d4ea00097h1.pdf]

# Kinetics of the Reactions of the Criegee Intermediate $\text{CH}_2\text{OO}$ with Water Vapour: Experimental Measurements as a Function of Temperature and Global Atmospheric Modelling

Rachel E. Lade,<sup>a</sup> Mark A. Blitz,<sup>a,b</sup> Matthew Rowlinson,<sup>c</sup> Mathew J. Evans,<sup>c,d</sup> Paul W. Seakins,<sup>a</sup> and Daniel Stone<sup>\*a</sup>

<sup>a</sup> School of Chemistry, University of Leeds, Leeds, LS2 9JT, UK

<sup>b</sup> National Centre for Atmospheric Science, University of Leeds, Leeds, LS2 9JT, UK

<sup>c</sup> Wolfson Atmospheric Chemistry Laboratories, Department of Chemistry, University of York, York YO10 5DQ, UK

<sup>d</sup> National Centre for Atmospheric Science, University of York, York YO10 5DQ, UK

\* Corresponding author

Email: d.stone@leeds.ac.uk

## Supplementary Information

|                                                                                                        |          |
|--------------------------------------------------------------------------------------------------------|----------|
| 1. Hygrometer Calibration and Measurements of Water Vapour                                             | Page S2  |
| 2. Instrument Response Function (IRF)                                                                  | Page S3  |
| 3. Mixed-Order Analysis                                                                                | Page S4  |
| 4. Concentration-time Profiles for $\text{CH}_2\text{I}_2$ and IO                                      | Page S5  |
| 5. Analysis in Terms of $k_{2,\text{eff}}$ and Use of Literature Values for $K_{\text{eq}}^{\text{D}}$ | Page S6  |
| 6. Investigation of the Potential Reaction Between $\text{CH}_2\text{OO}$ and Three Water Molecules    | Page S8  |
| 7. Experimental Uncertainties                                                                          | Page S10 |
| 8. Comparison of global and local fit results for $k_{2,\text{eff}}$                                   | Page S10 |
| 9. Comparison of Observations with Previous Work                                                       | Page S11 |
| 10. Values for $k_1$ and $k_{2,\text{eff}}$ used in GEOS-Chem Simulations                              | Page S13 |
| 11. Experimental Data                                                                                  | Page S14 |
| 12. References                                                                                         | Page S16 |

## 1. Hygrometer Calibration and Measurements of Water Vapour

Water was introduced into the reaction system by passing a flow of N<sub>2</sub> through a bubbler containing deionised water and then combined with the N<sub>2</sub>-O<sub>2</sub> in a gas manifold using calibrated mass flow controllers (MFCs). The water vapour concentration was measured using relative humidity (RH) probes (Michell Instruments PCMini 52) that were calibrated against a dew point hygrometer (Buck Research Instruments, CR-4 chilled mirror hygrometer) for RH between 0 and 80 % (Figure S1).

Experiments involving two calibrated RH probes (RH1 and RH2) were carried out to ensure that no water vapour was being lost throughout the experimental apparatus. The first probe (RH1) was placed at the exit of the reaction cell at all times (where RH measurements were made for the experiments), and the second probe (RH2) was initially placed at the end of the gas mixing manifold, and then moved to the entrance of the reaction cell. For each position of RH2, the flow through the water bubbler was increased and decreased, whilst maintaining a total flow of 3.7 standard litres per minute and comparisons between RH1 and RH2 were made. Under all flow conditions, RH readings from RH1 and RH2 were within the reported error value (0.2 % RH) from each other.

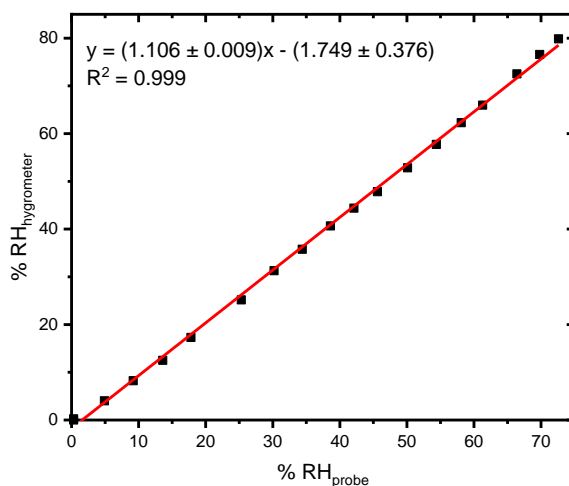

Figure S1. Calibration of the relative humidity (RH) measured with the RH probe used for experiments against the RH measured using a dew point hygrometer. The red line represents a linear fit to the data and gave: gradient =  $(1.106 \pm 0.009)$ , intercept =  $-(1.749 \pm 0.376)$  and  $R^2 = 0.999$ .

## 2. Instrument Response Function (IRF)

All experiments throughout this work were carried out under pseudo-first-order conditions, where the concentrations of water monomers and dimers were in excess over the concentration of CH<sub>2</sub>OO. The change in concentration of CH<sub>2</sub>OO can therefore be described by a single exponential decay (ES1).

$$[\text{CH}_2\text{OO}]_t = [\text{CH}_2\text{OO}]_0 \times \exp(-k't) \quad (\text{ES1})$$

where  $[\text{CH}_2\text{OO}]_t$  is the concentration of CH<sub>2</sub>OO at time  $t$ ,  $[\text{CH}_2\text{OO}]_0$  is the concentration of CH<sub>2</sub>OO at time zero, and  $k'$  is the observed rate coefficient.

For time resolved experiments, the detector was exposed to light for time periods between 10 and 100  $\mu\text{s}$ , and then the photocharge from the ten rows of the illuminated region was binned and summed, and shifted vertically into the adjacent row in the storage region at the same shift rate at which the photocharge was shifted in the illuminated region. As a result of this, the measured temporal profiles of CH<sub>2</sub>OO are fit using an equation that describes a convolution of the 'true' kinetic decay of CH<sub>2</sub>OO (ES1) with an instrument response function (IRF) described by a Gaussian centred at time  $t_c$  with a width  $w$  (ES2).<sup>1,2</sup>

$$[\text{CH}_2\text{OO}]_t = \frac{[\text{CH}_2\text{OO}]_0}{2} \exp\left[\frac{(k'w)^2}{2} - k'(t - t_c)\right] \times \left[1 + \text{erf}\left(\frac{t - t_c - k'w^2}{\sqrt{2}w}\right)\right] \quad (\text{ES2})$$

where erf is the error function acquired through the integration of the normalised Gaussian function.

All data were fit to equations incorporating the instrument response function (ES2).

### 3. Mixed-Order Analysis

To investigate the suitability of describing the kinetics using a first-order model (as shown in the main text), the data were also analysed using a mixed first- and second-order model (ES3).

$$[\text{CH}_2\text{OO}]_t = \frac{k'[\text{CH}_2\text{OO}]_0}{k' \exp(k't) - 2k''[\text{CH}_2\text{OO}]_0 + 2k''[\text{CH}_2\text{OO}]_0 \exp(k't)} \quad (\text{ES3})$$

where  $[\text{CH}_2\text{OO}]_0$  is the  $\text{CH}_2\text{OO}$  concentration at time zero,  $[\text{CH}_2\text{OO}]_t$  is the  $\text{CH}_2\text{OO}$  concentration at time  $t$ ,  $k'$  is the first-order loss component for  $\text{CH}_2\text{OO}$  and  $k''$  is the second-order loss component.

Convolution of the IRF with the mixed first- and second-order kinetic decay (Equation S3), as described above, gives Equation S4:

$$[\text{CH}_2\text{OO}]_t = \left\{ \frac{1}{\left( \frac{1}{[\text{CH}_2\text{OO}]_0} + \frac{2k''}{k'} \right)} \right\} \exp \left\{ \frac{(k'w)^2}{2} - k'(t - t_c) + \frac{2k''}{k'} \right\} \times \frac{\left\{ 1 + \text{erf} \left( \frac{t - t_c - k'w^2}{\sqrt{2}w} \right) \right\}}{2} \quad (\text{ES4})$$

Figure S2 compares fitting a typical concentration-time profile for  $\text{CH}_2\text{OO}$  with the first-order model (Equation S2, solid red line) and the mixed first- and second-order model (Equation S4, dashed blue line). Results show less than a 5 % difference between the first-order component obtained from each fit, and we therefore conclude that the data are well-described by pseudo-first-order kinetics.

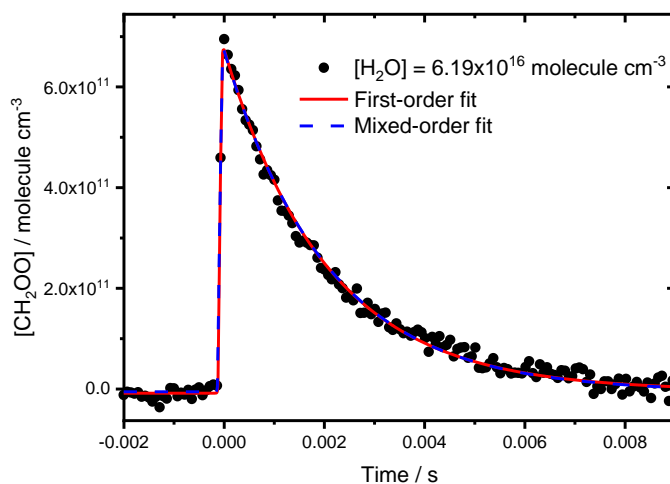

Figure S2. Comparison between a first-order fit (red) and mixed-order fit (blue) for data at 324 K and 760 Torr. The first-order fit gave  $k' = (728 \pm 14) \text{ s}^{-1}$  and  $[\text{CH}_2\text{OO}]_0 = (7.05 \pm 0.07) \times 10^{11} \text{ molecule cm}^{-3}$ . The mixed-order fit gave:  $k' = (703 \pm 10) \text{ s}^{-1}$ ,  $k'' = (9.18 \pm 0.33) \times 10^{-11} \text{ cm}^3 \text{ molecule}^{-1} \text{ s}^{-1}$ , and  $[\text{CH}_2\text{OO}]_0 = (7.20 \pm 0.22) \times 10^{11} \text{ molecule cm}^{-3}$ .

#### 4. Concentration–time Profiles for CH<sub>2</sub>I<sub>2</sub> and IO

As described in the main text, absorbance spectra obtained in these experiments contain contributions from the precursor, CH<sub>2</sub>I<sub>2</sub>, and IO formed via secondary chemistry. Figures S3 and S4 show typical concentration-time profiles for both CH<sub>2</sub>I<sub>2</sub> and IO obtained in this work. The change in concentration of CH<sub>2</sub>I<sub>2</sub>,  $\Delta[\text{CH}_2\text{I}_2]$ , is negative due to its depletion upon photolysis, and then remains effectively constant on the timescale of the experiment. The concentration-time profile for IO (Figure S4) shows a rapid initial production, followed by a slower production and subsequent decay. The production of IO following the photolysis of CH<sub>2</sub>I<sub>2</sub>-O<sub>2</sub> has been investigated in a number of previous studies and has been shown to be a result of secondary chemistry involving iodine atoms<sup>3-6</sup> (a more detailed overview can be found in Mir *et al.*<sup>7</sup>).

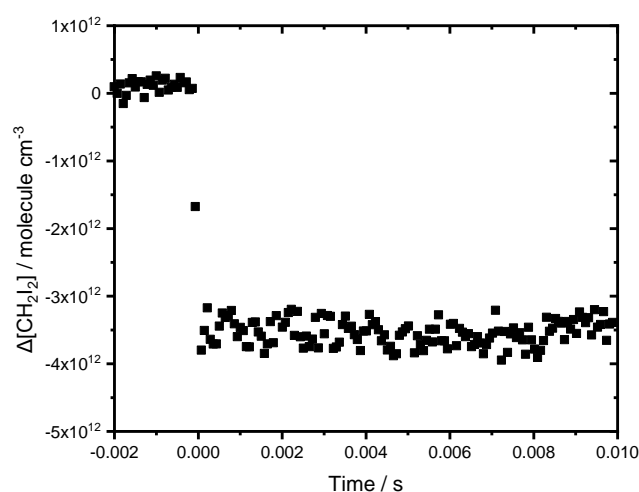

Figure S3. Concentration-time profile for CH<sub>2</sub>I<sub>2</sub> for an experiment at 760 Torr and 298 K. For these data, [H<sub>2</sub>O] = 0, [CH<sub>2</sub>I<sub>2</sub>] =  $4.1 \times 10^{13}$  molecule cm<sup>-3</sup>, and  $\Delta[\text{CH}_2\text{I}_2] = 3.5 \times 10^{12}$  molecule cm<sup>-3</sup>.

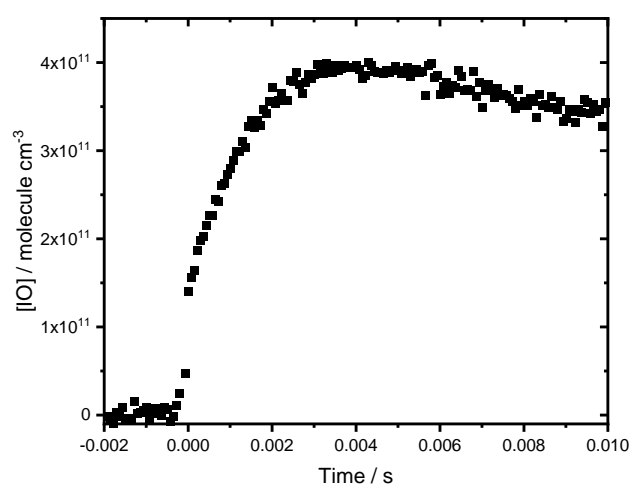

Figure S4. Concentration-time profile for IO for an experiment at 760 Torr and 298 K. For these data, [H<sub>2</sub>O] = 0 and [CH<sub>2</sub>I<sub>2</sub>] =  $4.1 \times 10^{13}$  molecule cm<sup>-3</sup>.

## 5. Analysis in Terms of $k_{2,\text{eff}}$ and Use of Literature Values for $K_{\text{eq}}^{\text{D}}$

Describing the reaction using  $k_{2,\text{eff}}$  ( $k_{2,\text{eff}} = k_2 K_{\text{eq}}^{\text{D}}$ ) is advantageous as it eliminates the potential discrepancy between calculations of the water dimer concentrations resulting from the use of a different value for  $K_{\text{eq}}^{\text{D}}$  to that adopted in this work. When comparing previous experimental investigations of this reaction, it is noted that some studies<sup>8,9</sup> utilise  $K_{\text{eq}}^{\text{D}}$  values reported by Scribano *et al.*,<sup>10</sup> whereas others,<sup>11-13</sup> including the work presented here, use  $K_{\text{eq}}^{\text{D}}$  values reported by Ruscic *et al.*<sup>14</sup>

Table S1 compares the  $K_{\text{eq}}^{\text{D}}$  values reported by Scribano *et al.* and Ruscic *et al.* for a range of temperatures and demonstrates the differences in calculated water dimer concentrations using the different values for  $K_{\text{eq}}^{\text{D}}$ . The differences in calculated water dimer concentrations impact calculated values for CH<sub>2</sub>OO kinetics with water dimers if the kinetics are described in terms of the water dimer concentration directly (i.e. using  $\text{rate}_{\text{R2}} = k_2[\text{CH}_2\text{OO}][(\text{H}_2\text{O})_2]$ ), leading to errors of up to 25 % if the reference for  $K_{\text{eq}}^{\text{D}}$  is not consistent with that used in this work.

When describing the kinetics of the reaction of CH<sub>2</sub>OO with water dimers in terms of water monomer concentrations (i.e. using  $\text{rate}_{\text{R2}} = k_{2,\text{eff}} [\text{CH}_2\text{OO}][\text{H}_2\text{O}]^2$ ), values for  $k_{2,\text{eff}}$  reported in this work can be used directly, without need to calculate  $K_{\text{eq}}^{\text{D}}$  separately, thereby reducing the potential for introducing errors in the calculated kinetics.

| $T / \text{K}$ | $[\text{H}_2\text{O}] / \text{molecule cm}^{-3}$ | $K_{\text{eq}}^{\text{D}} / \text{bar}^{-1}$<br>(Scribano <i>et al.</i> <sup>10</sup> ) | $[(\text{H}_2\text{O})_2] / \text{molecule cm}^{-3}$ | $k' / \text{s}^{-1}$ | $K_{\text{eq}}^{\text{D}} / \text{bar}^{-1}$<br>(Ruscic <i>et al.</i> <sup>14</sup> ) | $[(\text{H}_2\text{O})_2] / \text{molecule cm}^{-3}$ | $k' / \text{s}^{-1}$ | $k'_{\text{Ruscic}} / k'_{\text{Scribano}}$ |
|----------------|--------------------------------------------------|-----------------------------------------------------------------------------------------|------------------------------------------------------|----------------------|---------------------------------------------------------------------------------------|------------------------------------------------------|----------------------|---------------------------------------------|
| <b>262</b>     | $7.23 \times 10^{16}$                            | 0.1471                                                                                  | $2.78 \times 10^{13}$                                | 803                  | 0.1194                                                                                | $2.25 \times 10^{13}$                                | 650                  | 0.81                                        |
| <b>298</b>     | $7.63 \times 10^{17}$                            | 0.0519                                                                                  | $1.24 \times 10^{15}$                                | 11767                | 0.0501                                                                                | $1.20 \times 10^{15}$                                | 11388                | 0.97                                        |
| <b>353</b>     | $9.80 \times 10^{18}$                            | 0.0150                                                                                  | $7.02 \times 10^{16}$                                | 188136               | 0.0187                                                                                | $8.75 \times 10^{16}$                                | 234500               | 1.25                                        |

Table S1. A comparison of the Equilibrium constant,  $K_{\text{eq}}^{\text{D}}$ , values reported by Scribano *et al.*<sup>10</sup> and Ruscic *et al.*<sup>14</sup> for water dimer formation at 262, 298 and 353 K, and impacts on calculated water dimer concentrations and pseudo-first-order losses for CH<sub>2</sub>OO resulting from reaction with water dimers when described explicitly in terms of water dimer concentrations (i.e.  $k' = k_2[(\text{H}_2\text{O})_2]$ , using values for  $k_2$  determined at each temperature in this work).

## 6. Investigation of the Potential Reaction between CH<sub>2</sub>OO and Three Water Molecules

Kinetics of CH<sub>2</sub>OO reactions in the presence of water vapour have been investigated by Wu *et al.*<sup>13</sup> in experiments performed between 290 and 346 K using UV absorption spectroscopy, which demonstrated evidence for a reaction between CH<sub>2</sub>OO and three water molecules. Wu *et al.* investigated the behaviour of  $(k'-k_0)[\text{H}_2\text{O}]^{-2}$ , where  $k'$  and  $k_0$  represent the pseudo-first-order rate coefficients describing the loss of CH<sub>2</sub>OO in the presence and absence of water vapour, respectively, and  $[\text{H}_2\text{O}]$  is the water monomer concentration. If the loss of CH<sub>2</sub>OO were dominated by reaction with water dimers,  $(k'-k_0)[\text{H}_2\text{O}]^{-2}$  would not be expected to display any dependence on  $[\text{H}_2\text{O}]$ , while contributions from monomer reactions would show a negative dependence of  $(k'-k_0)[\text{H}_2\text{O}]^{-2}$  on  $[\text{H}_2\text{O}]$  at low  $[\text{H}_2\text{O}]$ , and contributions involving reactions with three water molecules would show a positive dependence of  $(k'-k_0)[\text{H}_2\text{O}]^{-2}$  on  $[\text{H}_2\text{O}]$  at high  $[\text{H}_2\text{O}]$ . Results obtained by Wu *et al.* indicated that there is a contribution to the loss of CH<sub>2</sub>OO from a reaction involving three water molecules at 298 K which becomes more significant at lower temperatures.

Figure S5 shows the dependence of  $(k'-k_0)[\text{H}_2\text{O}]^{-2}$  on  $[\text{H}_2\text{O}]$  for data obtained at the lowest (262 K) and highest (353 K) temperatures studied in this work and at 298 K, where the dashed blue lines represent the parameterisation reported by Wu *et al.*<sup>13</sup> The data obtained in this work indicate that there is no significant contribution from a reaction involving three water molecules under the conditions employed in this work. To fully investigate the potential role of a reaction involving three water molecules in the atmospheric removal of CH<sub>2</sub>OO, further experiments need to be carried out under higher  $[\text{H}_2\text{O}]$ , as with the work of Wu *et al.*, where this reaction will be more significant and the relationship between  $k'$  and  $k_3[\text{H}_2\text{O}]$  would be more evident on the bimolecular plot.



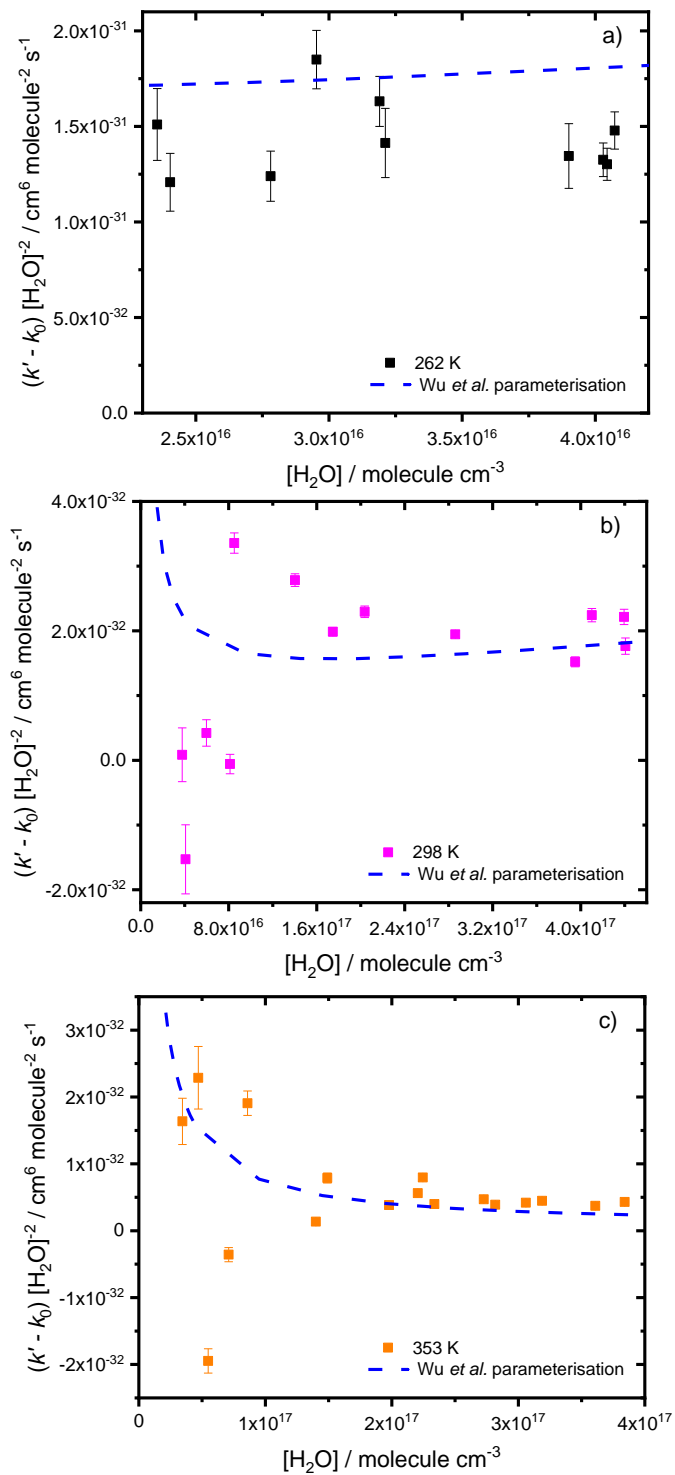

Figure S5. Dependence of  $(k' - k_0)[\text{H}_2\text{O}]^{-2}$  on  $[\text{H}_2\text{O}]$  for data obtained in this work at a) 262 K, b) 298 K and c) 353 K. The blue dashed line represents the equation  $(k' - k_0)[\text{H}_2\text{O}]^{-2} = k_1[\text{H}_2\text{O}]^{-1} + k_2 + k_3[\text{H}_2\text{O}]$ , where  $k_1$ ,  $k_2$  and  $k_3$  were obtained from the work of Wu *et al.*<sup>13</sup>

## 7. Experimental Uncertainties

The uncertainty in the equilibrium constant,  $K_{\text{eq}}^{\text{D}}$ , taken from Ruscic *et al.*<sup>14</sup> ranges between 2.7 and 3.6 % for the temperature range studied in this work. The RH probe used to determine the water vapour concentration was calibrated using a hygrometer, which gave an uncertainty in the RH readings of 7.9 %. The flow of gases to the reaction cell were controlled using three calibrated MFCs, which gave a combined uncertainty of 5.5 %. On the basis of these uncertainties, we have placed an overall systematic error of 10 % on values of  $k_1$  and  $k_{2,\text{eff}}$  to account for the uncertainties in the water monomer concentration and a 14 % systematic error on values of  $k_2$  to account for the additional uncertainty of  $K_{\text{eq}}^{\text{D}}$ .

## 8. Comparison of Global and Local Fit Results for $k_{2,\text{eff}}$

Fits described in the main text to find  $k_{2,\text{eff}}$  were performed globally over all temperatures. Local fits to data at each temperature were unable to retrieve  $k_1$  reliably, but values obtained for  $k_{2,\text{eff}}$ , and Arrhenius parameters for  $k_{2,\text{eff}}$ , from local fits were in good agreement with those obtained in the global fits. Figure S6 shows the comparison between the global fit (which gave  $k_{2,\text{eff}} = (2.78 \pm 0.28) \times 10^{-38} \exp((4010 \pm 400)/T) \text{ cm}^6 \text{ molecule}^{-2} \text{ s}^{-1}$ ) and the local fits (which gave  $k_{2,\text{eff}} = (2.71 \pm 1.30) \times 10^{-38} \exp((4050 \pm 130)/T) \text{ cm}^6 \text{ molecule}^{-2} \text{ s}^{-1}$ ).

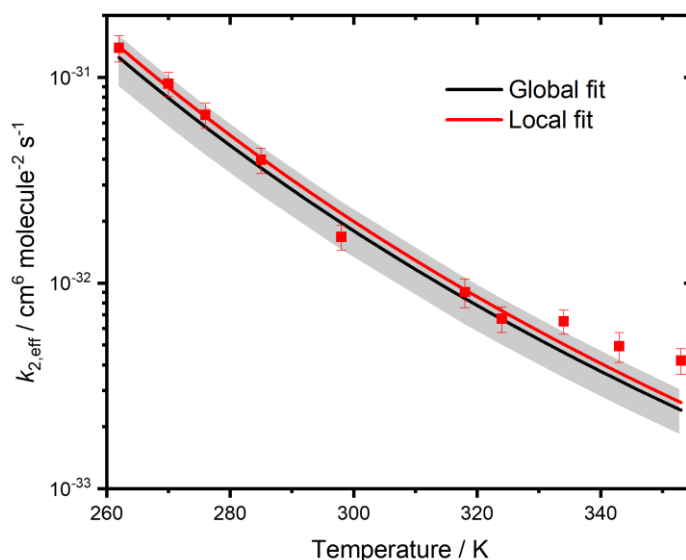

Figure S6. Comparison of the parameterisations for  $k_{2,\text{eff}}$  using the Arrhenius parameters determined from the global fits (black line, as shown in the main text, with uncertainties shown in the grey shaded region) and the values for  $k_{2,\text{eff}}$  obtained from local fits to data at each temperature (red points) with the Arrhenius fit (red line). The global fit gave  $k_{2,\text{eff}} = (2.78 \pm 0.28) \times 10^{-38} \exp((4010 \pm 400)/T) \text{ cm}^6 \text{ molecule}^{-2} \text{ s}^{-1}$  while the local fits gave  $k_{2,\text{eff}} = (2.71 \pm 1.30) \times 10^{-38} \exp((4050 \pm 130)/T) \text{ cm}^6 \text{ molecule}^{-2} \text{ s}^{-1}$ .

## 9. Comparison of Observations with Previous Work

Figure S7 compares the total pseudo-first-order losses observed in this work and the work of Wu *et al.* as well as the individual contributions of  $k_1$  and  $k_{2,\text{eff}}$  from this work and  $k_1$ ,  $k_{2,\text{eff}}$  and  $k_{3,\text{eff}}$  from Wu *et al.* The value for  $k_{2,\text{eff}}$  reported by Wu *et al.*<sup>13</sup> at 298 K is a factor of  $\sim 1.8$  lower than that reported here, but there is good agreement in the total pseudo-first-order rate coefficients as a function of water monomer concentration observed in this work and reported by Wu *et al.*, and direct comparison of individual terms contributing to the total pseudo-first-order rate coefficients is not entirely appropriate owing to the different numbers of terms included.

Figure S7 (Page S12, below). Pseudo-first-order losses as a function of H<sub>2</sub>O concentration for experiments at 262 – 353 K. Black points represent the experimental data, the green and blue solid lines represent losses due to reaction with the water monomer and the water dimer and the solid red line represents the total loss. The results of Wu *et al.*<sup>13</sup> are also included in the plot, where the orange, pink and grey dashed lines represent reactions with the water monomer, dimer and the reaction involving three water molecules, and the purple dashed line represents the total loss. The light blue dotted line on (e) represents  $[\text{H}_2\text{O}] = 4.8 \times 10^{17}$  molecule cm<sup>-3</sup>, the point at which Wu *et al.* report the reaction with three water molecules becomes significant at 298 K.

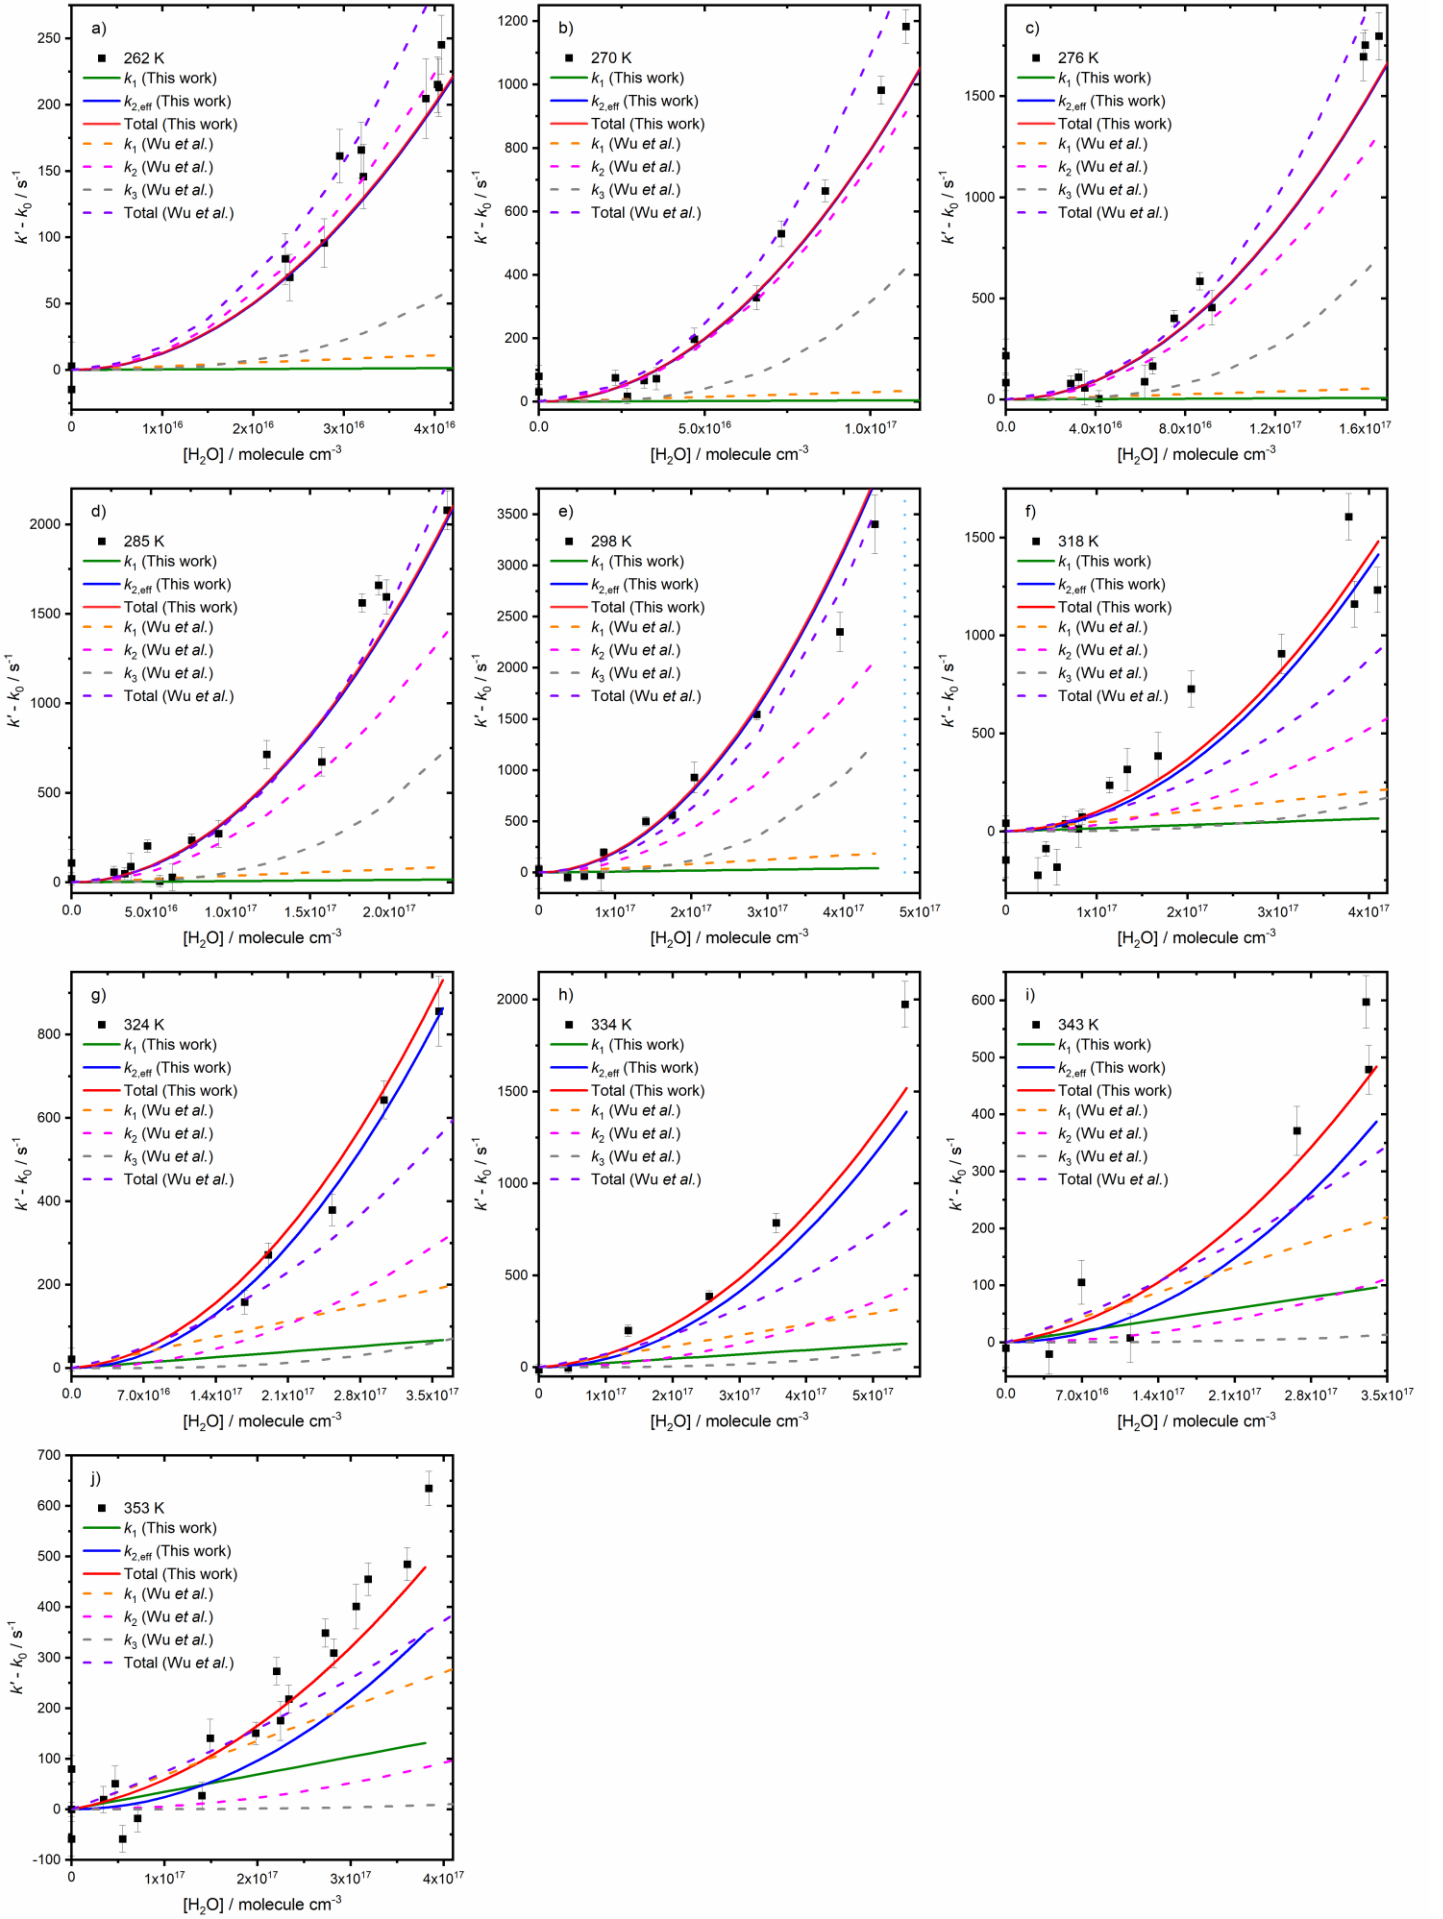

## 10. Values for $k_1$ and $k_{2,\text{eff}}$ used in GEOS-Chem Simulations

Figure S8 compares the rate coefficients for the reactions of  $\text{CH}_2\text{OO}$  with  $\text{H}_2\text{O}$  and  $(\text{H}_2\text{O})_2$  at temperatures between 200 and 400 K used in the three GEOS-Chem model simulations (outlined in Table 4 in the main text).

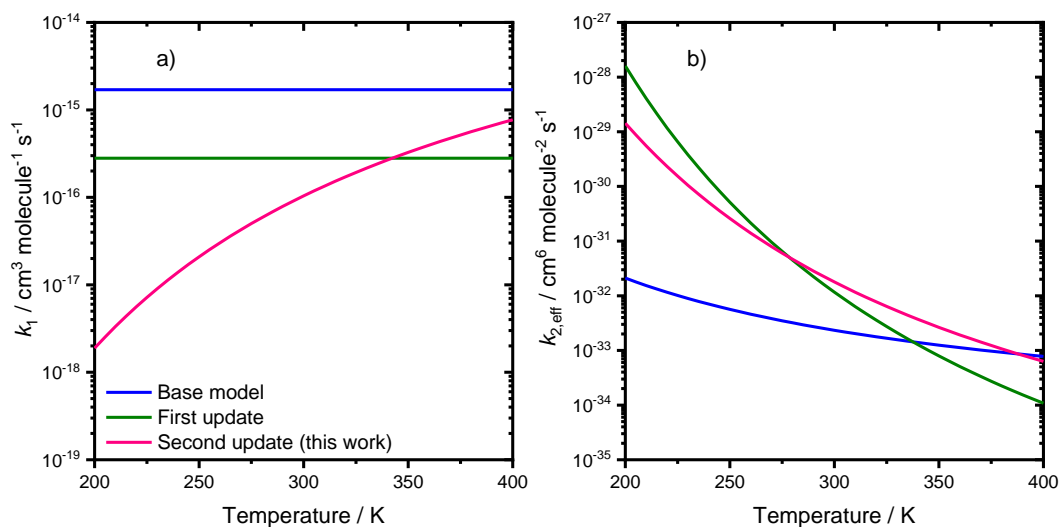

Figure S8. Comparison of rate coefficients used in GEOS-Chem for reactions of  $\text{CH}_2\text{OO}$  with (a) the water monomer and (b) the water dimer at temperatures between 200 and 400 K. Parameterisations are given in the main text.

## 11. Experimental Data

| $T / \text{K}$ | $[\text{CH}_2\text{I}_2]_0 / 10^{13}$<br>molecule $\text{cm}^{-3}$ | $[\text{H}_2\text{O}] / 10^{16}$<br>molecule $\text{cm}^{-3}$ | $[(\text{H}_2\text{O})_2] / 10^{13}$<br>molecule $\text{cm}^{-3}$ | $k' / \text{s}^{-1}$ | $k' - k_0 / \text{s}^{-1}$ |
|----------------|--------------------------------------------------------------------|---------------------------------------------------------------|-------------------------------------------------------------------|----------------------|----------------------------|
| <b>262</b>     | 5.8                                                                | 0                                                             | 0                                                                 | $483 \pm 10$         | $3 \pm 18$                 |
|                |                                                                    | 2.40                                                          | 0.25                                                              | $550 \pm 9$          | $70 \pm 17$                |
|                |                                                                    | 2.78                                                          | 0.34                                                              | $576 \pm 10$         | $96 \pm 18$                |
|                |                                                                    | 2.95                                                          | 0.38                                                              | $641 \pm 13$         | $161 \pm 20$               |
|                |                                                                    | 3.21                                                          | 0.45                                                              | $626 \pm 19$         | $146 \pm 24$               |
|                |                                                                    | 3.90                                                          | 0.66                                                              | $685 \pm 26$         | $205 \pm 30$               |
|                |                                                                    | 4.07                                                          | 0.72                                                              | $725 \pm 16$         | $245 \pm 22$               |
| <b>262</b>     | 5.7                                                                | 0                                                             | 0                                                                 | $573 \pm 7$          | $-15 \pm 18$               |
|                |                                                                    | 2.35                                                          | 0.24                                                              | $672 \pm 10$         | $84 \pm 19$                |
|                |                                                                    | 3.19                                                          | 0.44                                                              | $754 \pm 13$         | $166 \pm 21$               |
|                |                                                                    | 4.03                                                          | 0.70                                                              | $803 \pm 14$         | $215 \pm 21$               |
|                |                                                                    | 4.04                                                          | 0.71                                                              | $801 \pm 14$         | $213 \pm 21$               |
| <b>270</b>     | 5.8                                                                | 0                                                             | 0                                                                 | $470 \pm 6$          | $80 \pm 34$                |
|                |                                                                    | 3.54                                                          | 0.45                                                              | $463 \pm 10$         | $73 \pm 35$                |
|                |                                                                    | 4.69                                                          | 0.79                                                              | $588 \pm 10$         | $198 \pm 35$               |
|                |                                                                    | 6.56                                                          | 1.55                                                              | $718 \pm 17$         | $328 \pm 38$               |
|                |                                                                    | 7.31                                                          | 1.93                                                              | $920 \pm 23$         | $530 \pm 40$               |
|                |                                                                    | 10.3                                                          | 3.84                                                              | $1372 \pm 28$        | $982 \pm 44$               |
|                |                                                                    | 11.1                                                          | 4.42                                                              | $1573 \pm 42$        | $1183 \pm 54$              |
| <b>270</b>     | 5.8                                                                | 0                                                             | 0                                                                 | $342 \pm 11$         | $32 \pm 24$                |
|                |                                                                    | 2.31                                                          | 0.19                                                              | $386 \pm 11$         | $76 \pm 24$                |
|                |                                                                    | 2.67                                                          | 0.26                                                              | $328 \pm 12$         | $18 \pm 24$                |
|                |                                                                    | 3.17                                                          | 0.32                                                              | $378 \pm 14$         | $68 \pm 25$                |
|                |                                                                    | 8.64                                                          | 2.69                                                              | $975 \pm 27$         | $665 \pm 34$               |
| <b>276</b>     | 5.9                                                                | 0                                                             | 0                                                                 | $620 \pm 7$          | $217 \pm 83$               |
|                |                                                                    | 3.51                                                          | 0.39                                                              | $461 \pm 8$          | $58 \pm 83$                |
|                |                                                                    | 6.19                                                          | 1.21                                                              | $492 \pm 10$         | $89 \pm 84$                |
|                |                                                                    | 9.18                                                          | 2.67                                                              | $858 \pm 25$         | $455 \pm 87$               |
|                |                                                                    | 15.9                                                          | 8.02                                                              | $2098 \pm 82$        | $1695 \pm 117$             |
|                |                                                                    | 16.6                                                          | 8.74                                                              | $2200 \pm 83$        | $1797 \pm 118$             |
| <b>276</b>     | 6.1                                                                | 0                                                             | 0                                                                 | $316 \pm 10$         | $84 \pm 39$                |
|                |                                                                    | 2.89                                                          | 0.26                                                              | $312 \pm 9$          | $80 \pm 39$                |
|                |                                                                    | 3.24                                                          | 0.33                                                              | $343 \pm 11$         | $111 \pm 39$               |
|                |                                                                    | 4.15                                                          | 0.54                                                              | $236 \pm 13$         | $4 \pm 40$                 |
|                |                                                                    | 6.54                                                          | 1.35                                                              | $398 \pm 15$         | $166 \pm 40$               |
|                |                                                                    | 7.51                                                          | 1.78                                                              | $635 \pm 14$         | $403 \pm 40$               |
|                |                                                                    | 8.64                                                          | 2.36                                                              | $818 \pm 21$         | $586 \pm 43$               |
|                |                                                                    | 16.0                                                          | 8.12                                                              | $1986 \pm 65$        | $1754 \pm 75$              |
| <b>285</b>     | 6.2                                                                | 0                                                             | 0                                                                 | $572 \pm 6$          | $109 \pm 74$               |
|                |                                                                    | 3.73                                                          | 0.37                                                              | $551 \pm 8$          | $88 \pm 75$                |
|                |                                                                    | 6.33                                                          | 1.06                                                              | $492 \pm 9$          | $29 \pm 75$                |
|                |                                                                    | 9.26                                                          | 2.26                                                              | $736 \pm 15$         | $273 \pm 76$               |
|                |                                                                    | 12.3                                                          | 3.97                                                              | $1177 \pm 27$        | $714 \pm 79$               |
|                |                                                                    | 15.7                                                          | 6.53                                                              | $1137 \pm 27$        | $674 \pm 79$               |
|                |                                                                    | 19.8                                                          | 10.3                                                              | $2058 \pm 60$        | $1595 \pm 95$              |
|                |                                                                    | 23.6                                                          | 14.7                                                              | $2543 \pm 79$        | $2080 \pm 109$             |
| <b>285</b>     | 6.3                                                                | 0                                                             | 0                                                                 | $225 \pm 9$          | $20 \pm 33$                |
|                |                                                                    | 2.67                                                          | 0.18                                                              | $262 \pm 9$          | $57 \pm 33$                |
|                |                                                                    | 3.34                                                          | 0.29                                                              | $253 \pm 11$         | $48 \pm 34$                |
|                |                                                                    | 4.78                                                          | 0.60                                                              | $408 \pm 11$         | $203 \pm 34$               |
|                |                                                                    | 5.54                                                          | 0.81                                                              | $212 \pm 9$          | $7 \pm 33$                 |
|                |                                                                    | 7.57                                                          | 1.51                                                              | $441 \pm 13$         | $236 \pm 34$               |

|            |     |      |      |            |            |
|------------|-----|------|------|------------|------------|
|            |     | 18.3 | 8.80 | 1766 ± 39  | 1561 ± 50  |
|            |     | 19.3 | 9.82 | 1866 ± 43  | 1661 ± 54  |
| <b>298</b> | 4.1 | 0    | 0    | 522 ± 5    | 32 ± 41    |
|            |     | 3.77 | 0.29 | 445 ± 6    | -45 ± 41   |
|            |     | 5.97 | 0.74 | 459 ± 7    | -31 ± 41   |
|            |     | 8.51 | 1.49 | 687 ± 11   | 197 ± 42   |
|            |     | 14.0 | 4.06 | 991 ± 19   | 501 ± 45   |
|            |     | 17.5 | 6.30 | 1051 ± 20  | 561 ± 45   |
|            |     | 28.6 | 16.9 | 2035 ± 34  | 1545 ± 53  |
| <b>298</b> | 6.4 | 0    | 0    | 313 ± 7    | -5 ± 148   |
|            |     | 8.12 | 0.14 | 292 ± 10   | -26 ± 148  |
|            |     | 20.4 | 0.86 | 1247 ± 37  | 929 ± 152  |
|            |     | 39.5 | 0.32 | 2669 ± 120 | 2351 ± 190 |
|            |     | 44.1 | 0.40 | 3722 ± 245 | 3404 ± 286 |
| <b>318</b> | 4.2 | 0    | 0    | 496 ± 18   | -146 ± 91  |
|            |     | 3.52 | 0.18 | 418 ± 19   | -224 ± 91  |
|            |     | 5.63 | 0.47 | 460 ± 24   | -182 ± 92  |
|            |     | 7.99 | 0.95 | 654 ± 29   | -13 ± 93   |
|            |     | 13.4 | 2.64 | 958 ± 63   | 316 ± 109  |
|            |     | 16.8 | 4.16 | 1028 ± 81  | 386 ± 120  |
|            |     | 20.4 | 6.17 | 1370 ± 25  | 728 ± 92   |
|            |     | 30.3 | 13.6 | 1549 ± 48  | 907 ± 101  |
|            |     | 38.4 | 21.8 | 1803 ± 77  | 1161 ± 117 |
|            |     | 40.9 | 24.7 | 1875 ± 74  | 1233 ± 116 |
| <b>318</b> | 3.8 | 0    | 0    | 585 ± 9    | 43 ± 36    |
|            |     | 4.42 | 0.29 | 455 ± 13   | -87 ± 37   |
|            |     | 6.56 | 0.64 | 581 ± 16   | 39 ± 38    |
|            |     | 8.40 | 1.04 | 616 ± 18   | 74 ± 39    |
|            |     | 11.4 | 1.93 | 779 ± 22   | 237 ± 41   |
|            |     | 37.8 | 21.1 | 2148 ± 114 | 1606 ± 119 |
| <b>324</b> | 4.1 | 0    | 0    | 590 ± 11   | 21 ± 28    |
|            |     | 16.8 | 3.8  | 728 ± 14   | 159 ± 29   |
|            |     | 19.1 | 4.92 | 841 ± 13   | 272 ± 29   |
|            |     | 25.3 | 8.65 | 949 ± 27   | 380 ± 37   |
|            |     | 30.3 | 12.4 | 1212 ± 38  | 643 ± 46   |
|            |     | 35.6 | 17.2 | 1425 ± 80  | 856 ± 84   |
| <b>334</b> | 4.2 | 0    | 0    | 465 ± 8    | -13 ± 28   |
|            |     | 4.37 | 0.22 | 475 ± 7    | -3 ± 28    |
|            |     | 13.3 | 2.08 | 678 ± 14   | 200 ± 30   |
|            |     | 25.5 | 7.59 | 864 ± 16   | 386 ± 31   |
|            |     | 35.5 | 14.7 | 1263 ± 46  | 785 ± 53   |
|            |     | 54.8 | 35.1 | 2453 ± 122 | 1975 ± 125 |
| <b>343</b> | 4.8 | 0    | 0    | 385 ± 12   | -10 ± 34   |
|            |     | 3.98 | 0.17 | 375 ± 14   | -20 ± 35   |
|            |     | 6.93 | 0.50 | 500 ± 21   | 105 ± 39   |
|            |     | 11.4 | 1.35 | 402 ± 28   | 8 ± 43     |
|            |     | 26.7 | 7.40 | 766 ± 28   | 371 ± 43   |
|            |     | 33.0 | 11.3 | 992 ± 33   | 597 ± 46   |
|            |     | 33.3 | 11.5 | 874 ± 28   | 479 ± 43   |
| <b>353</b> | 4.8 | 0    | 0    | 532 ± 4    | 80 ± 26    |
|            |     | 3.44 | 0.11 | 471 ± 4    | 19 ± 26    |
|            |     | 5.48 | 0.27 | 394 ± 5    | -58 ± 26   |
|            |     | 7.11 | 0.46 | 434 ± 5    | -18 ± 26   |
|            |     | 14.0 | 1.79 | 479 ± 7    | 27 ± 27    |
|            |     | 22.1 | 4.44 | 725 ± 9    | 273 ± 27   |
|            |     | 27.3 | 6.79 | 801 ± 10   | 349 ± 28   |

|            |     |      |      |           |          |
|------------|-----|------|------|-----------|----------|
|            |     | 31.9 | 9.28 | 907 ± 19  | 455 ± 32 |
|            |     | 36.1 | 11.9 | 937 ± 20  | 485 ± 33 |
|            |     | 38.4 | 13.5 | 1087 ± 22 | 635 ± 34 |
| <b>353</b> | 5.1 | 0    | 0    | 468 ± 13  | 0 ± 14   |
|            |     | 19.8 | 3.57 | 618 ± 22  | 150 ± 22 |
|            |     | 23.4 | 4.98 | 686 ± 28  | 218 ± 28 |
|            |     | 28.2 | 7.25 | 777 ± 28  | 309 ± 29 |
| <b>353</b> | 5.5 | 0    | 0    | 502 ± 8   | -58 ± 35 |
|            |     | 4.70 | 0.20 | 611 ± 10  | 51 ± 35  |
|            |     | 14.9 | 2.03 | 701 ± 17  | 141 ± 38 |
|            |     | 22.5 | 4.60 | 735 ± 20  | 175 ± 39 |
|            |     | 30.6 | 8.55 | 961 ± 29  | 401 ± 44 |

Table S2. Experimental data obtained in this work. All experiments were carried out at a total pressure of 760 Torr. Values for  $k_0$  for each dataset at constant  $T$  and  $\text{CH}_2\text{I}_2$  concentration were determined from the fits to  $k'$  as a function of water monomer concentration.

## 11. References

1. C. Robinson, L. Onel, J. Newman, R. Lade, K. Au, L. Sheps, D. E. Heard, P. W. Seakins, M. A. Blitz and D. Stone, *The Journal of Physical Chemistry A*, 2022, **126**, 6984-6994.
2. L. Onel, R. Lade, J. Mortiboy, M. A. Blitz, P. W. Seakins, D. E. Heard and D. Stone, *Physical Chemistry Chemical Physics*, 2021, **23**, 19415-19423.
3. W.-L. Ting, C.-H. Chang, Y.-F. Lee, H. Matsui, Y.-P. Lee and J. J.-M. Lin, *The Journal of Chemical Physics*, 2014, **141**, 104308.
4. T. J. Gravestock, M. A. Blitz, W. J. Bloss and D. E. Heard, *Chemical Physics and Physical Chemistry*, 2010, **11**, 3928-3941.
5. T. J. Dillon, M. E. Tucceri, R. Sander and J. N. Crowley, *Physical Chemistry Chemical Physics*, 2008, **10**, 1540-1554.
6. E. S. Foreman and C. Murray, *The Journal of Physical Chemistry A*, 2015, **119**, 8981-8990.
7. Z. S. Mir, T. R. Lewis, L. Onel, M. A. Blitz, P. W. Seakins and D. Stone, *Physical Chemistry Chemical Physics*, 2020, **22**, 9448-9459.
8. T. R. Lewis, M. A. Blitz, D. E. Heard and P. W. Seakins, *Physical Chemistry Chemical Physics*, 2015, **17**, 4859-4863.
9. T. Berndt, J. Voigtländer, F. Stratmann, H. Junninen, R. L. Mauldin III, M. Sipilä, M. Kulmala and H. Herrmann, *Physical Chemistry Chemical Physics*, 2014, **16**, 19130-19136.
10. Y. Scribano, N. Goldman, R. J. Saykally and C. Leforestier, *The Journal of Physical Chemistry A*, 2006, **110**, 5411-5419.
11. M. C. Smith, C.-H. Chang, W. Chao, L.-C. Lin, K. Takahashi, K. A. Boering and J. J.-M. Lin, *The Journal of Physical Chemistry Letters*, 2015, **6**, 2708-2713.
12. W. Chao, J.-T. Hsieh, C.-H. Chang and J. J.-M. Lin, *Science*, 2015, **347**, 751.
13. Y.-J. Wu, K. Takahashi and J. J.-M. Lin, *The Journal of Physical Chemistry A*, 2023, **127**, 9059-8072.
14. B. Ruscic, *The Journal of Physical Chemistry A*, 2013, **117**, 11940-11953.
